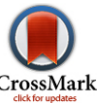

## Correction

# Correction: Vitamin D Supplementation Enhances the Fixation of Titanium Implants in Chronic Kidney Disease Mice

The *PLOS ONE* Staff

## Notice of Republication

This article was republished on May 21st, 2014, due to the figures being published as Supporting Information. The publisher apologizes for this error. Please download the PDF again to view the figures in the corrected article. The originally published, uncorrected article and the republished, corrected article are provided here for reference.

## Supporting Information

File S1. Originally published, uncorrected article (PDF)

File S2. Republished, corrected article (PDF)

## Reference

1. Liu W, Zhang S, Zhao D, Zou H, Sun N, et al. (2014) Vitamin D Supplementation Enhances the Fixation of Titanium Implants in Chronic Kidney Disease Mice. *PLoS ONE* 9(4): e95689. doi:10.1371/journal.pone.0095689

**Citation:** The *PLOS ONE* Staff (2014) Correction: Vitamin D Supplementation Enhances the Fixation of Titanium Implants in Chronic Kidney Disease Mice. *PLoS ONE* 9(6): e99972. doi:10.1371/journal.pone.0099972

**Published:** June 12, 2014

**Copyright:** © 2014 The *PLOS ONE* Staff. This is an open-access article distributed under the terms of the Creative Commons Attribution License, which permits unrestricted use, distribution, and reproduction in any medium, provided the original author and source are credited.
